# Supplementary material for: Capacitance in carbon pores of 0.7 to 15 nm: a regular pattern
Source: Royal Society of Chemistry journal article supplement (doi:10.1039/c1cp20748b), 2011-01-01
Supplement: c1cp20748b.pdf [file c1cp20748b.pdf]

## Supplementary Information

### Capacitance in carbon pores of 0.7 to 15 nm: a regular pattern

Teresa A. Centeno <sup>\*</sup>, Olha Sereda, Fritz Stoeckli <sup>\*</sup>

E-mail: [fritz.stoeckli@unine.ch](mailto:fritz.stoeckli@unine.ch), [teresa@incar.csic.es](mailto:teresa@incar.csic.es)

### Materials and Methods

The study is based on 28 porous carbons of different origins. They are listed in Tables S1-S3 with their main structural, electrochemical and calorimetric properties and further details regarding the experimental procedures can be found elsewhere.<sup>1-4</sup> For comparison purposes, 6 mesoporous carbons<sup>5</sup> characterized by the same structural and electrochemical protocols were also used (Table S4). These carbons have low oxygen contents, as confirmed by TPD and/or the comparison of the enthalpies of immersion into water and benzene.<sup>6</sup> Consequently, as indicated in the main text, pseudocapacitance effects may be neglected and the capacitance in the aprotic TEABF<sub>4</sub>/ACN electrolyte depends essentially on the surface area.

The structural characterizations were performed by gas adsorption, using nitrogen at 77 K (*Micromeritics ASAP 2010*) for routine measurements. The standard software package provided the surface areas  $S_{\text{NLDFT}}$  and  $S_{\text{BET}}$ , but the data was also analyzed by applying Kaneko's comparison plot technique and Dubinin's theory. The total surface area was also determined by immersion calorimetry into 0.4 M solutions of phenol in water, using the factor of  $-0.105 \text{ J m}^{-2}$ . This technique,<sup>1</sup> like the comparison plot, is model-free and does not depend on the shape of the pores. Carbon tetrachloride (CCl<sub>4</sub>) and 2,5-norbornadiene (NBD) isotherms were determined separately at 293 K in a gravimetric apparatus of the MacBaine type. For certain samples, earlier results for N<sub>2</sub> (77 K), CH<sub>2</sub>Cl<sub>2</sub> (293 K), C<sub>6</sub>H<sub>6</sub> (293-298 K), CO<sub>2</sub> (273 K) and CCl<sub>4</sub> (293-298 K) isotherms and comparison plots were also used, in order to increase the available data. The different techniques (a)-(i) and the molecular probes used for each sample are listed in Table S1.

Immersion calorimetry was also used as a complementary technique to determine the enthalpies of immersion of the carbons into benzene, carbon tetrachloride and norbornadiene at 293 K. The Tian-Calvet calorimeters and the experimental procedures are described in detail elsewhere.<sup>7</sup>

The electrochemical performances were tested in a sandwich-type capacitor, set up with two carbon pellets and 1M (C<sub>2</sub>H<sub>5</sub>)<sub>4</sub>NBF<sub>4</sub> in acetonitrile as electrolyte. The capacitance was determined by galvanostatic charge-discharge cycles from 0 to 2 V at  $1 \text{ mA cm}^{-2}$  and cyclic voltammetry at  $1 \text{ mV s}^{-1}$ . Tests with a three-electrode cell for a selection of carbons provided comparable results for the 2M H<sub>2</sub>SO<sub>4</sub> electrolyte.<sup>2</sup>

## Outline of Dubinin's theory and its extension to immersion calorimetry

This theory describes the volume filling of micropores by vapours over a wide range of relative pressures and temperature. The fundamental expression is the Dubinin-Astakhov equation (1970)<sup>7-9</sup>

$$W = W_o \exp[-(RT \ln(p_s/p)/E)^n] \quad (n = 2 \text{ to } 3) \quad (\text{S1})$$

where

- $W_o$  is the limiting volume of the micropores and  $W$  the volume filled at  $(T; p/p_s)$ . The experimental information is the amount adsorbed  $n_a$ , usually in  $\text{mmol g}^{-1}$  and  $W = n_a V_m^a$ . It is assumed that  $V_m^a$ , the molar volume in the adsorbed state, is close to the molar volume of the free liquid at the same temperature and pressure.

- $E$  is the so-called characteristic energy of adsorption, which depends on both the solid and the adsorbate. It has been shown that for adsorptives without specific interactions with the carbon, there exists a scaling factor, called the affinity coefficient  $\beta$ , relative to benzene taken as a reference. For a given vapour (i),  $E_i = \beta_i E_o$ , where  $E_o = E(\text{C}_6\text{H}_6)$ . For the adsorbates used in this study, carbon tetrachloride and 2,5-norbornadiene,  $\beta(\text{CCl}_4) = 1.05$ , and  $\beta(\text{NBD}) = 1.12$ . These coefficients have been listed by Wood<sup>10</sup> and empirical relations exist for their calculation.

- $n$  is related to the width of the adsorption energy distribution and the most frequent case, where exponent  $n = 2$ , is known as the Dubinin-Radushkevich (DR) equation. On the other hand, for adsorption in relatively narrow pores a better fit is frequently obtained with  $n$  between 2 and 3. This is the case for  $\text{CCl}_4$  and NBD in pores of less than 1 nm.

It has been shown that  $E_o$  itself is related to the average width  $L_o$  (nm) of locally slit-shaped micropores by<sup>4,11,12</sup>

$$L_o(\text{DR}) \text{ (nm)} = 10.8/(E_o - 11.4 \text{ kJ mol}^{-1}) \quad (\text{S2})$$

As shown in Table S1, the values of  $L_o(\text{DR})$  and  $L_o(\text{NLDFT})$ , also based on the model of slit-shaped pores, show some scatter, but statistically their overall correlation is close to unity. The surface area of the micropore walls is therefore

$$S_{mi}(\text{m}^2 \text{ g}^{-1}) = 2000 W_o(\text{cm}^3 \text{ g}^{-1}) / L_o(\text{nm}) \quad (\text{S3})$$

It follows that the total surface area accessible to the probe is

$$S_{\text{tot}} = S_{mi} + S_e \quad (\text{S4})$$

where  $S_e$  is the area found in larger pores and on the outside of the sample.

Equations (S2) and (S3) are valid for pores up to approximately 1.5 nm. Beyond these dimensions, their morphology may change, but  $S_{tot}$  can still be determined by other techniques. They include Kaneko's comparison plot technique,<sup>1</sup> which leads to both  $S_{mi}$  and  $S_e$ , and the selective adsorption of sparingly soluble molecules from aqueous solutions (e.g. phenol) limited to a single monolayer on the carbon. The latter approach is based either on the liquid-solid isotherm, or the specific enthalpy of transfer from the solution onto the carbon (for phenol  $-0.105 \pm 0.05 \text{ J m}^{-2}$ ).<sup>3</sup>

Dubinin's theory has the property that its parameters  $E$  and  $n$  are temperature invariant and a theoretical development of (S1) leads to the enthalpy of immersion into the corresponding liquid adsorbate<sup>4,7</sup>

$$-\Delta_i H(\text{J g}^{-1}) = E_o \beta W_o (1 + \alpha T) \sqrt{\pi/2} V_m - h_i S_e \quad (\text{S5})$$

$\alpha$  is the thermal expansion coefficient of the liquid of molar volume  $V_m$  and  $-h_i S_e$  represents the wetting of the external surface, usually a small fraction of the total enthalpy. Typical values are  $h_i(\text{C}_6\text{H}_6) = -0.114 \text{ J m}^{-2}$ ,  $h_i(\text{CCl}_4) = -0.115 \text{ J m}^{-2}$  and  $h_i(\text{NBD}) = -0.110 \text{ J m}^{-2}$  (for the latter, a recent determination).

Since  $W_o = n_{ao}(\text{mmol g}^{-1})V_m(\text{cm}^3 \text{ g}^{-1})$ , Eqn (S5) can also be written in the form

$$-\Delta_i H(\text{J g}^{-1}) = E_o \beta n_{ao} (1 + \alpha T) \sqrt{\pi/2} - h_i S_e \quad (\text{S6})$$

which does not contain explicitly the micropore volume  $W_o$ , but only the gravimetric amount  $n_{ao}$  adsorbed at saturation.

The experimental determination of  $\Delta_i H$  provides an important test for self-consistency for the adsorption data of a given vapour, for example  $\text{C}_6\text{H}_6$ ,  $\text{CCl}_4$  and  $\text{NBD}$  used in the present study (see Table S3). This is illustrated, for example, by the agreement between the experimental enthalpies of immersion  $\Delta_i H(\text{C}_6\text{H}_6)$  and the values calculated using the parameters of the  $\text{N}_2$  (77 K) isotherm, two small molecules probing the same micropore volume for our carbons.

Moreover, as confirmed experimentally, in the case of equal accessibility of a micropore system by  $\text{CCl}_4$  and  $\text{C}_6\text{H}_6$  where  $W_o(\text{CCl}_4)/W_o(\text{C}_6\text{H}_6) = 1$ , Equation (S5) leads to  $\Delta_i H(\text{CCl}_4)/\Delta_i H(\text{C}_6\text{H}_6) = 0.97$ . The comparison of the two enthalpies of immersion provides a quick test for the accessibility of the pore system by  $\text{CCl}_4$  and, consequently, the  $(\text{C}_2\text{H}_5)_4\text{N}^+$  ion examined in the present study.

If the ratio of the enthalpies is close to 0.97, the total  $S_{tot} = S_{mi} + S_e$  determined by small probes such as nitrogen, argon and benzene, is also accessible to  $\text{CCl}_4$ . On the other hand, smaller values (samples 6-11/ Table S3) indicate a reduced accessibility to  $S_{mi}$  and the area  $S_{mi}(\text{CCl}_4)$  must be determined separately. This requires the determination of the  $\text{CCl}_4$  adsorption isotherm (typically at 293 K or 298 K) and its analysis with the help of equations (S1)-(S3). The characteristic energy  $E(\text{CCl}_4)$  leads to  $E_o = E(\text{CCl}_4)/\beta(\text{CCl}_4)$  which corresponds to the part of micropore system filled by  $\text{CCl}_4$ . If it were probed by  $\text{C}_6\text{H}_6$ , one would obtain this value of  $E_o$ .

The average pore width  $L_o(\text{CCl}_4)$  is given by (S2) and (S4) leads to the total surface area accessible to  $\text{CCl}_4$ ,  $S_{\text{tot}}(\text{CCl}_4)$ . This area can be compared with the value obtained from the comparison of the  $\text{CCl}_4$  isotherm with a reference  $\text{CCl}_4$  isotherm on a non porous carbon of known surface area (in our case *Vulcan 3G*;  $71 \text{ m}^2 \text{ g}^{-1}$ ). Moreover, the quality of the adsorption data for  $\text{CCl}_4$  can be cross-checked by comparing the experimental enthalpy of immersion  $\Delta_i H(\text{CCl}_4)$  with the value calculated from equation (S4) by using  $W_o(\text{CCl}_4)$ ,  $E(\text{CCl}_4)$  and  $S_e$ . The same approach applies to norbornadiene and the corresponding results obtained for carbons with narrow pores are shown in Tables S2-S3 (samples 7 to 11).

**Table S1.** Structural properties of the microporous carbons obtained by different techniques, where SM refers to small molecules. For carbons 12-22, only N<sub>2</sub> (77 K) isotherms were determined and it is assumed that W<sub>0</sub>(N<sub>2</sub>) and W<sub>0</sub>(CCl<sub>4</sub>) are identical, as suggested by the enthalpies of immersion into carbon tetrachloride (CCl<sub>4</sub>), norbornadiene (NBD) and benzene (C<sub>6</sub>H<sub>6</sub>) (see Table S3).

| No | Carbon<br>(origin)     | Average micropore size<br>(nm) |                        | Total surface area                                    |                                    | Specific surface area<br>(m <sup>2</sup> g <sup>-1</sup> ) |                | S <sub>e</sub><br>(m <sup>2</sup> g <sup>-1</sup> ) | W <sub>o</sub><br>(cm <sup>3</sup> g <sup>-1</sup> ) |      | Techniques used<br>(see list below) |
|----|------------------------|--------------------------------|------------------------|-------------------------------------------------------|------------------------------------|------------------------------------------------------------|----------------|-----------------------------------------------------|------------------------------------------------------|------|-------------------------------------|
|    |                        | L <sub>o</sub> (DR)            | L <sub>o</sub> (NLDFT) | S <sub>tot</sub><br>(m <sup>2</sup> g <sup>-1</sup> ) | S <sub>BET</sub> (N <sub>2</sub> ) | S <sub>NLDFT</sub> (N <sub>2</sub> )                       | N <sub>2</sub> |                                                     | CCl <sub>4</sub>                                     |      |                                     |
| 1  | N-125-08<br>(Peat)     | 1.60                           | 1.18                   | SM                                                    | 791 ± 40 (5)                       | 1317                                                       | 958            | 157                                                 | 0.51                                                 | 0.64 | (a)(b)(d)(e)(i)                     |
|    |                        | CCl <sub>4</sub>               |                        | 846 ± 40 (1)                                          |                                    |                                                            |                |                                                     |                                                      |      |                                     |
| 2  | F-02<br>(Coconut)      | 1.48                           | 1.12                   | SM                                                    | 849 ± 70 (4)                       | 1223                                                       | 953            | 45                                                  | 0.50                                                 | 0.63 | (a)(b)(c)(d)(i)                     |
|    |                        | CCl <sub>4</sub>               |                        | 840 ± 30 (2)                                          |                                    |                                                            |                |                                                     |                                                      |      |                                     |
| 3  | DCG-5<br>(Coal)        | 1.15                           | 1.02                   | SM                                                    | 956± 85 (5)                        | 1121                                                       | 923            | 25                                                  | 0.49                                                 | 0.53 | (a)(b)(c)(d)(g)(h)(i)               |
|    |                        | CCl <sub>4</sub>               |                        | 827 ± 15 (1)                                          |                                    |                                                            |                |                                                     |                                                      |      |                                     |
| 4  | A056<br>(Coal)         | 1.22                           | 1.52                   | SM                                                    | 457 ± 28 (4)                       | 678                                                        | 215            | 20                                                  | 0.26                                                 | 0.29 | (a)(b)(d)(e)                        |
|    |                        | CCl <sub>4</sub>               |                        | 488 ± 23 (2)                                          |                                    |                                                            |                |                                                     |                                                      |      |                                     |
| 5  | TiC/SiC<br>(Carbide)   | 0.94                           | 1.16                   | SM                                                    | 1241 ± 48 (3)                      | 1237                                                       | 634            | 18                                                  | 0.60                                                 | 0.59 | (a)(b)(d)(i)                        |
|    |                        | CCl <sub>4</sub>               |                        | 1357 ± 55 (1)                                         |                                    |                                                            |                |                                                     |                                                      |      |                                     |
| 6  | CEP-2008<br>(Wood)     | 0.95                           | 0.95                   | SM                                                    | 1040 ± 90 (2)                      | 1266                                                       | 983            | 7                                                   | 0.50                                                 | 0.48 | (a)                                 |
|    |                        | CCl <sub>4</sub>               |                        | 1061 ± 25 (1)                                         |                                    |                                                            |                |                                                     |                                                      |      |                                     |
| 7  | AC-507-17<br>(Fibre)   | 0.87                           | 0.85                   | SM                                                    | 1258 ± 93 (3)                      | 1176                                                       | 1098           | 1                                                   | 0.58                                                 | 0.49 | (a) (i)                             |
|    |                        | 0.90                           |                        | CCl <sub>4</sub>                                      | 1082 ± 35 (1)                      |                                                            |                |                                                     |                                                      |      |                                     |
|    |                        | 0.89                           |                        | NBD                                                   | 1035 ± 25 (1)                      |                                                            |                |                                                     |                                                      |      |                                     |
| 8  | CMS-H2- 2007<br>(Coal) | 0.81                           | 0.81                   | SM                                                    | 686 ± 33 (7)                       | 567                                                        | 570            | 25                                                  | 0.27                                                 | 0.23 | (a)(b)(c)(d)(e)(f)<br>(h)(i)        |
|    |                        | 0.94                           |                        | CCl <sub>4</sub>                                      | 500 ± 20 (2)                       |                                                            |                |                                                     |                                                      |      |                                     |
|    |                        | 0.96                           |                        | NBD                                                   | 515 ± 25 (1)                       |                                                            |                |                                                     |                                                      |      |                                     |
| 9  | PAU-1<br>(Saran)       | 0.73                           | 0.81                   | SM                                                    | 1266 ± 60 (3)                      | 1001                                                       | 975            | 4                                                   | 0.48                                                 | 0.33 | (a)(b)(d)(f)(i)                     |
|    |                        | 0.74                           |                        | CCl <sub>4</sub>                                      | 930 ± 36 (1)                       |                                                            |                |                                                     |                                                      |      |                                     |
|    |                        | 0.68                           |                        | NBD                                                   | 913 ± 30(1)                        |                                                            |                |                                                     |                                                      |      |                                     |
| 10 | PAU-1-950<br>(Saran)   | 0.75                           | 0.83                   | SM                                                    | 1197 ± 120 (4)                     | 1063                                                       | 848            | 4                                                   | 0.50                                                 | 0.35 | (a)(d)(f)(i)                        |
|    |                        | 0.71                           |                        | CCl <sub>4</sub>                                      | 977 ± 35 (1)                       |                                                            |                |                                                     |                                                      |      |                                     |
|    |                        | 0.78                           |                        | NBD                                                   | 817 ± 25(1)                        |                                                            |                |                                                     |                                                      |      |                                     |
| 11 | HK-650-8<br>(PET)      | 0.66                           | 0.80                   | SM                                                    | 1000 ± 170(3)                      | 661                                                        | 573            | 65                                                  | 0.30                                                 | 0.12 | (a)(d)(i)                           |
|    |                        | 0.72                           |                        | CCl <sub>4</sub>                                      | 374 ± 15 (2)                       |                                                            |                |                                                     |                                                      |      |                                     |
| 12 | U03<br>(Coal)          | 1.56                           | 1.09                   | SM                                                    | 690 ± 30(4)                        | 1172                                                       | 914            | 25                                                  | 0.50                                                 | -    | (a)(b)(c)(i)                        |
| 13 | M30<br>(Pitch)         | 1.45                           | 1.43                   | SM                                                    | 1145 ± 41(3)                       | 2298                                                       | 1286           | 10                                                  | 0.79                                                 | -    | (a)(i)                              |
| 14 | M1R-950<br>(Coconut)   | 1.41                           | 1.06                   | SM                                                    | 966 ± 117(3)                       | 1417                                                       | 1137           | 5                                                   | 0.64                                                 | -    | (a)(i)                              |

**Table S1. Continued**

| No | Carbon<br>(origin)        | Average micropore size<br>(nm) |                     | Total surface area<br>$S_{\text{tot}}$<br>( $\text{m}^2 \text{g}^{-1}$ ) | Specific surface area<br>( $\text{m}^2 \text{g}^{-1}$ ) |                                | $S_e$<br>( $\text{m}^2 \text{g}^{-1}$ ) | $W_o$<br>( $\text{cm}^3 \text{g}^{-1}$ ) |                | Techniques used<br>(see list below) |                 |
|----|---------------------------|--------------------------------|---------------------|--------------------------------------------------------------------------|---------------------------------------------------------|--------------------------------|-----------------------------------------|------------------------------------------|----------------|-------------------------------------|-----------------|
|    |                           | $L_o(\text{DR})$               | $L_o(\text{NLDFT})$ |                                                                          | $S_{\text{BET}}(\text{N}_2)$                            | $S_{\text{NLDFT}}(\text{N}_2)$ |                                         | $\text{N}_2$                             | $\text{CCl}_4$ |                                     |                 |
|    |                           |                                |                     |                                                                          |                                                         |                                |                                         |                                          |                |                                     |                 |
| 15 | KF-1500/08<br>(Fibre)     | 1.38                           | 1.12                | SM                                                                       | $987 \pm 66(6)$                                         | 1568                           | 1198                                    | 21                                       | 0.60           | -                                   | (a)(b)(c)(h)(i) |
| 16 | Super DLC-30<br>(Coconut) | 1.24                           | 1.10                | SM                                                                       | $961 \pm 20(3)$                                         | 1618                           | 1147                                    | 9                                        | 0.60           | -                                   | (a)(i)          |
| 17 | M1R<br>(Coconut)          | 1.23                           | 1.38                | SM                                                                       | $1072 \pm 20(9)$                                        | 1555                           | 1053                                    | 7                                        | 0.67           | -                                   | (a)(i)          |
| 18 | BCK-A<br>(Coconut)        | 1.14                           | 1.08                | SM                                                                       | $1007 \pm 94(3)$                                        | 1405                           | 1138                                    | 6                                        | 0.60           | -                                   | (a)(i)          |
| 19 | SiC-800<br>(Carbide)      | 0.90                           | 0.85                | SM                                                                       | $1261 \pm 40(3)$                                        | 1200                           | 1064                                    | 17                                       | 0.56           | -                                   | (a)(i)          |
| 20 | SiC-900<br>(Carbide)      | 0.92                           | 0.84                | SM                                                                       | $1320 \pm 120(3)$                                       | 1350                           | 1254                                    | 35                                       | 0.60           | -                                   | (a)(i)          |
| 21 | SiC-1000<br>(Carbide)     | 0.90                           | 0.95                | SM                                                                       | $1376 \pm 61(3)$                                        | 1234                           | 1024                                    | 50                                       | 0.58           | -                                   | (a)(i)          |
| 22 | TiC-600<br>(Carbide)      | 0.88                           | 0.86                | SM                                                                       | $1290 \pm 127(3)$                                       | 1373                           | 1178                                    | 2                                        | 0.60           | -                                   | (a)(i)          |

List of techniques used for the structural characterization

- (a)  $\text{N}_2$  (77 K) isotherm with comparison plot, DR, BET and NLDFT analysis
- (b)  $\text{C}_6\text{H}_6$  and/or  $\text{CH}_2\text{Cl}_2$  isotherm (293 K)
- (c)  $\text{C}_6\text{H}_6$  and/or  $\text{CH}_2\text{Cl}_2$  comparison plot (293 K) (ref. *Hoechst, N234-G*)
- (d)  $\text{CCl}_4$  isotherm (293 K, in some cases also 298 K and 303 K)
- (e)  $\text{CCl}_4$  (293 K) comparison plot (ref. *Vulcan-3G* and/or *Hoechst*)
- (f) NBD isotherm (293 K)
- (g)  $\text{CO}_2$  (273 K) isotherm
- (h)  $\text{CO}_2$  (273 K) comparison plot (ref. *Vulcan-3G*)
- (i) Phenol adsorption from aqueous solution (mainly calorimetry; some liquid-solid isotherms)

**Table S2.** Calorimetric properties of the carbons. Experimental and calculated enthalpies of immersion. For carbons 1 to 12, the enthalpies of immersion  $\Delta_i H(\text{CCl}_4)$  and  $\Delta_i H(\text{NBD})$  were calculated from the corresponding isotherms. For carbons 12-22, where no  $\text{CCl}_4$  and NBD isotherms are available, the enthalpies of immersion are calculated on the basis of data from  $\text{N}_2$  (77 K) adsorption. For these carbons, the agreement between the experimental and calculated values of  $\Delta_i H(\text{C}_6\text{H}_6)$ ,  $\Delta_i H(\text{CCl}_4)$ ,  $\Delta_i H(\text{NBD})$  and their ratios confirm the accessibility of the entire pore system to the  $(\text{C}_2\text{H}_5)_4\text{N}^+$  ion.

| No | Carbon<br>(origin)    | $-\Delta_i H(\text{C}_6\text{H}_6)$<br>(J g <sup>-1</sup> ) |      | $-\Delta_i H(\text{CCl}_4)$<br>(J g <sup>-1</sup> ) |      | $-\Delta_i H(\text{NBD})$<br>(J g <sup>-1</sup> ) |      | $\Delta_i H(\text{CCl}_4)/\Delta_i H(\text{C}_6\text{H}_6)$ |      |
|----|-----------------------|-------------------------------------------------------------|------|-----------------------------------------------------|------|---------------------------------------------------|------|-------------------------------------------------------------|------|
|    |                       | exp                                                         | calc | exp                                                 | calc | exp                                               | calc | exp                                                         | calc |
| 1  | N-125-08<br>(Peat)    | 156                                                         | 153  | 162                                                 | 160  | 147                                               | 149  | 1.04                                                        | 1.05 |
| 2  | F-02<br>(Coconut)     | 168                                                         | 168  | 168                                                 | 165  | 156                                               | 163  | 1.00                                                        | 0.98 |
| 3  | DCG-5<br>(Coal)       | 151                                                         | 141  | 143                                                 | 139  | 156                                               | 140  | 0.95                                                        | 0.99 |
| 4  | A056<br>(Coal)        | 92                                                          | 78   | 89                                                  | 84   | 106                                               | 86   | 0.97                                                        | 1.08 |
| 5  | TiC/SiC<br>(Carbide)  | 201                                                         | 189  | 205                                                 | 182  | 191                                               | 184  | 1.02                                                        | 0.96 |
| 6  | CEP-2008<br>(Wood)    | 156                                                         | 156  | 138                                                 | 148  | 143                                               | 151  | 0.89                                                        | 0.95 |
| 7  | ACC-507-17<br>(Fibre) | 177                                                         | 156  | 162                                                 | 154  | 154                                               | 142  | 0.92                                                        | 0.99 |
| 8  | CMS-H2-2007<br>(Coal) | 92                                                          | 92   | 65                                                  | 70   | 77                                                | 70   | 0.70                                                        | 0.76 |
| 9  | PAU-1<br>(Saran)      | 175                                                         | 171  | 133                                                 | 118  | 119                                               | 111  | 0.76                                                        | 0.69 |
| 10 | PAU-1-950<br>(Saran)  | 172                                                         | 176  | 133                                                 | 121  | 114                                               | 105  | 0.77                                                        | 0.69 |
| 11 | HK-650-8<br>(PET)     | 120                                                         | 103  | 56                                                  | 47   | -                                                 | -    | 0.47                                                        | 0.46 |
| 12 | UO3<br>(Coal)         | 130                                                         | 127  | 126                                                 | 123  | 117                                               | 124  | 0.97                                                        | 0.97 |
| 13 | M30<br>(Pitch)        | 219                                                         | 204  | 207                                                 | 195  | 218                                               | 198  | 0.95                                                        | 0.96 |
| 14 | M1R-950<br>(Coconut)  | 166                                                         | 160  | 160                                                 | 160  | 175                                               | 161  | 0.96                                                        | 1.00 |
| 15 | KF-1500/08<br>(Fibre) | 149                                                         | 151  | 149                                                 | 143  | 152                                               | 146  | 1.00                                                        | 0.95 |

Table S2. Continued

| No | Carbon<br>(origin)        | $-\Delta_i H(C_6H_6)$<br>(J g <sup>-1</sup> ) |      | $-\Delta_i H(CCl_4)$<br>(J g <sup>-1</sup> ) |      | $-\Delta_i H(NBD)$<br>(J g <sup>-1</sup> ) |      | $\Delta_i H(CCl_4)/\Delta_i H(C_6H_6)$ |      |
|----|---------------------------|-----------------------------------------------|------|----------------------------------------------|------|--------------------------------------------|------|----------------------------------------|------|
|    |                           | exp                                           | calc | exp                                          | calc | exp                                        | calc | exp                                    | calc |
| 16 | Super DLC-30<br>(Coconut) | 155                                           | 165  | 148                                          | 158  | 189                                        | 160  | 0.96                                   | 0.96 |
| 17 | M1R<br>(Coconut)          | 175                                           | 185  | 163                                          | 177  | 175                                        | 179  | 0.93                                   | 0.96 |
| 18 | BCK-A<br>(Coconut)        | 179                                           | 171  | 162                                          | 156  | 162                                        | 166  | 0.91                                   | 0.91 |
| 19 | SiC-800<br>(Carbide)      | 192                                           | 180  | 164                                          | 174  | 189                                        | 176  | 0.85                                   | 0.97 |
| 20 | SiC-900<br>(Carbide)      | 204                                           | 193  | 198                                          | 186  | 200                                        | 188  | 0.97                                   | 0.96 |
| 21 | SiC-1000<br>(Carbide)     | 183                                           | 190  | 178                                          | 184  | 190                                        | 182  | 0.97                                   | 0.97 |
| 22 | TiC-600<br>(Carbide)      | 208                                           | 194  | 187                                          | 187  | 196                                        | 188  | 0.90                                   | 0.96 |

**Table S3.** Electrochemical properties of the carbons.

| No | Carbon<br>(origin)        | C<br>(F g <sup>-1</sup> ) | C/S(SM)<br>(F m <sup>-2</sup> ) | C/S(CCl <sub>4</sub> )<br>[C/S(NBD)]<br>(F m <sup>-2</sup> ) | C/S <sub>NLDFT</sub><br>(F m <sup>-2</sup> ) | C/S <sub>BET</sub><br>(F m <sup>-2</sup> ) |
|----|---------------------------|---------------------------|---------------------------------|--------------------------------------------------------------|----------------------------------------------|--------------------------------------------|
| 1  | N-125-08<br>(Peat)        | 83                        | 0.105 ± 0.011                   | 0.098 ± 0.010                                                | 0.087                                        | 0.063                                      |
| 2  | F-02<br>(Coconut)         | 89                        | 0.105 ± 0.014                   | 0.106 ± 0.010                                                | 0.093                                        | 0.073                                      |
| 3  | DCG-5<br>(Coal)           | 83                        | 0.087 ± 0.012                   | 0.100 ± 0.007                                                | 0.090                                        | 0.074                                      |
| 4  | A056<br>(Coal)            | 52                        | 0.114 ± 0.012                   | 0.107 ± 0.011                                                | 0.242                                        | 0.078                                      |
| 5  | TiC/SiC<br>(Carbide)      | 130                       | 0.105 ± 0.009                   | 0.096 ± 0.009                                                | 0.205                                        | 0.105                                      |
| 6  | CEP-2008<br>(Wood)        | 90                        | 0.086 ± 0.007                   | 0.085 ± 0.006                                                | 0.091                                        | 0.071                                      |
| 7  | ACC-507-17<br>(Fibre)     | 95                        | 0.076 ± 0.009                   | 0.088 ± 0.009<br>[0.092 ± 0.007]                             | 0.086                                        | 0.081                                      |
| 8  | CMS-H2-2007<br>(Coal)     | 55                        | 0.080 ± 0.008                   | 0.110 ± 0.010<br>[0.107 ± 0.010]                             | 0.096                                        | 0.097                                      |
| 9  | PAU-1<br>(Saran)          | 75                        | 0.060 ± 0.006                   | 0.081 ± 0.008<br>[0.082 ± 0.007]                             | 0.077                                        | 0.075                                      |
| 10 | PAU-1-950<br>(Saran)      | 93                        | 0.078 ± 0.012                   | 0.095 ± 0.009<br>[0.114 ± 0.009]                             | 0.110                                        | 0.087                                      |
| 11 | HK-650-8<br>(PET)         | 40                        | 0.040 ± 0.009                   | 0.107 ± 0.010                                                | 0.068                                        | 0.061                                      |
| 12 | UO3<br>(Coal)             | 66                        | 0.096 ± 0.009                   | 0.096 ± 0.009                                                | 0.073                                        | 0.057                                      |
| 13 | M30<br>(Pitch)            | 121                       | 0.109 ± 0.008                   | 0.109 ± 0.008                                                | 0.094                                        | 0.053                                      |
| 14 | M1R-950<br>(Coconut)      | 90                        | 0.093 ± 0.016                   | 0.093 ± 0.016                                                | 0.079                                        | 0.063                                      |
| 15 | KF-1500/08<br>(Fibre)     | 107                       | 0.108 ± 0.013                   | 0.108 ± 0.013                                                | 0.089                                        | 0.068                                      |
| 16 | Super DLC-30<br>(Coconut) | 95                        | 0.099 ± 0.007                   | 0.099 ± 0.007                                                | 0.083                                        | 0.059                                      |
| 17 | M1R<br>(Coconut)          | 91                        | 0.085 ± 0.006                   | 0.085 ± 0.006                                                | 0.086                                        | 0.058                                      |
| 18 | BCK-A<br>(Coconut)        | 92                        | 0.091 ± 0.013                   | 0.091 ± 0.013                                                | 0.081                                        | 0.065                                      |

Table S3. Continued

| No | Carbon<br>(origin)    | C<br>(F g <sup>-1</sup> ) | C/S(SM)<br>(F m <sup>-2</sup> ) | C/S(CCl <sub>4</sub> )<br>[C/S(NBD)]<br>(F m <sup>-2</sup> ) | C/S <sub>NLDFT</sub><br>(F m <sup>-2</sup> ) | C/S <sub>BET</sub><br>(F m <sup>-2</sup> ) |
|----|-----------------------|---------------------------|---------------------------------|--------------------------------------------------------------|----------------------------------------------|--------------------------------------------|
| 19 | SiC-800<br>(Carbide)  | 93                        | 0.074 ± 0.006                   | 0.074 ± 0.006                                                | 0.087                                        | 0.077                                      |
| 20 | SiC-900<br>(Carbide)  | 120                       | 0.091 ± 0.013                   | 0.091 ± 0.013                                                | 0.096                                        | 0.089                                      |
| 21 | SiC-1000<br>(Carbide) | 129                       | 0.094 ± 0.009                   | 0.094 ± 0.009                                                | 0.126                                        | 0.105                                      |
| 22 | TiC-600<br>(Carbide)  | 119                       | 0.092 ± 0.014                   | 0.092 ± 0.014                                                | 0.101                                        | 0.087                                      |

**Table S4.** Structural and electrochemical properties of predominantly mesoporous carbons. D<sub>p</sub> is the NLDFT-based pore diameter.

| No | Carbon<br>(origin)    | D <sub>p</sub><br>(nm) | Pore volume<br>(cm <sup>3</sup> g <sup>-1</sup> )  | Total surface area<br>S <sub>tot</sub><br>(m <sup>2</sup> g <sup>-1</sup> ) | Specific surface area<br>(m <sup>2</sup> g <sup>-1</sup> ) |                                      | C<br>(F g <sup>-1</sup> ) | C/S(SM)<br>(F m <sup>-2</sup> ) | Remarks                                                                                                                                                           |
|----|-----------------------|------------------------|----------------------------------------------------|-----------------------------------------------------------------------------|------------------------------------------------------------|--------------------------------------|---------------------------|---------------------------------|-------------------------------------------------------------------------------------------------------------------------------------------------------------------|
|    |                       |                        |                                                    |                                                                             | S <sub>BET</sub> (N <sub>2</sub> )                         | S <sub>NLDFT</sub> (N <sub>2</sub> ) |                           |                                 |                                                                                                                                                                   |
| 23 | Picactif<br>(Coconut) | 3.4                    | 1.35 (N <sub>2</sub> )                             | SM 1230 ± 57 (2)                                                            | 2260                                                       | 1181                                 | 107                       | 0.087 ± 0.009                   | Micropore volume 0.79 cm <sup>3</sup> g <sup>-1</sup><br>Δ <sub>i</sub> H(CCl <sub>4</sub> )/ Δ <sub>i</sub> H(C <sub>6</sub> H <sub>6</sub> ) <sub>exp</sub> = 1 |
| 24 | MP00-2<br>*(PVA/MgO)  | 5.1                    | 2.11 (N <sub>2</sub> )<br>1.74 (CCl <sub>4</sub> ) | SM 1285 ± 85 (4)<br>CCl <sub>4</sub> 1247 ± 53 (1)                          | 1810                                                       | 1000                                 | 100                       | 0.078 ± 0.009                   | Micropore volume 0.65 cm <sup>3</sup> g <sup>-1</sup><br>Δ <sub>i</sub> H(CCl <sub>4</sub> )/ Δ <sub>i</sub> H(C <sub>6</sub> H <sub>6</sub> ) <sub>exp</sub> = 1 |
| 25 | MP64-2<br>*(PVA/MgO)  | 5.4                    | 2.02 (N <sub>2</sub> )                             | SM 1286 ± 65(3)                                                             | 1736                                                       | 978                                  | 112                       | 0.087 ± 0.006                   | Micropore volume 0.66 cm <sup>3</sup> g <sup>-1</sup>                                                                                                             |
| 26 | MP55-2<br>*(PVA/MgO)  | 5.8                    | 2.20 (N <sub>2</sub> )                             | SM 1138 ± 46(3)                                                             | 1727                                                       | 980                                  | 100                       | 0.088 ± 0.006                   | Micropore volume 0.65 cm <sup>3</sup> g <sup>-1</sup>                                                                                                             |
| 27 | MP37-2<br>*(PVA/MgO)  | 10.5                   | 2.02 (N <sub>2</sub> )                             | SM 930 ± 39 (3)                                                             | 1197                                                       | 697                                  | 84                        | 0.090 ± 0.008                   | Micropore volume 0.46 cm <sup>3</sup> g <sup>-1</sup>                                                                                                             |
| 28 | MP19-2<br>*(PVA/MgO)  | 15.7                   | 1.03 (N <sub>2</sub> )                             | SM 486 ± 38 (3)                                                             | 590                                                        | 320                                  | 47                        | 0.097 ± 0.008                   | Micropore volume 0.23 cm <sup>3</sup> g <sup>-1</sup>                                                                                                             |

\* Poly(vinyl alcohol) carbonized with MgO

## Supplementary References

- 1 T. A. Centeno, F. Stoeckli, *Carbon*, 2010, **48**, 2478-2486.
- 2 T. A. Centeno, M. Hahn, J.A. Fernández, R. Kötz, F. Stoeckli, *Electrochem. Commun.*, 2007, **9**, 1242-1246.
- 3 E. Fernandez, D. Hugi-Cleary, V. López-Ramón, F. Stoeckli, *Langmuir*, 2003, **19**, 9719 -9723.
- 4 F. Stoeckli, in *Porosity in carbons. Characterization and applications*, (Ed: J. Patrick), Arnold, London, **1995**, pp. 67-92.
- 5 F. Stoeckli, A. Lavanchy, *Carbon*, 2000, **38**, 475-477.
- 6 J.A. Fernández, T. Morishita, M. Toyoda, M. Inagaki, F. Stoeckli, T.A. Centeno, *J. Power Sources*, 2008, **175**, 675-679.
- 7 R.C. Bansal, J.B. Donnet, F. Stoeckli, *Active Carbon*, Marcel Dekker, New York, **1988**, pp. 119
- 8 M.M. Dubinin, *Carbon*, 1989, **27**, 457-467.
- 9 F. Stoeckli, *Russ. Chem. Bull. Int. Ed.*, 2001, **50**, 2265-2270.
- 10 G.O. Wood, *Carbon*, 2001, **39**, 343-356.
- 11 F. Stoeckli, V. López-Ramón, D. Hugi-Cleary, A. Guillot, *Carbon*, 2001, **39**, 1115-1116.
- 12 T. Ohba, T. Suzuki, K. Kaneko, *Carbon*, 2000, **38**, 1892- 1896.
